# Supplementary material for: The Association between Red Blood Cell Distribution Width and Sarcopenia in U.S. Adults
Source: Springer Nature journal article supplement (doi:10.1038/s41598-018-29855-z), 2018-07-25
Supplement: 41598_2018_29855_MOESM1_ESM.pdf [file 41598_2018_29855_MOESM1_ESM.pdf]

# The Association between Red Blood Cell Distribution Width and Sarcopenia in U.S. Adults

Junghoon Kim<sup>1</sup>, Jeong-Soo Im<sup>1</sup>, Chang Hyu Choi<sup>2</sup>, Chul Hyun Park<sup>2</sup>, Jae Ik Lee<sup>2</sup>, Kuk Hui Son<sup>2\*</sup>,  
Yoon-Hyeong Choi<sup>1,3\*</sup>

## Authors Affiliation

<sup>1</sup> *Department of Preventive Medicine, Gachon University College of Medicine, Incheon, Republic of Korea*

<sup>2</sup> *Department of Thoracic and Cardiovascular Surgery, Gachon University Gil Medical Centre, Incheon, Republic of Korea*

<sup>3</sup> *Gachon Advanced Institute for Health Sciences and Technology, Gachon University, Incheon, Republic of Korea*

## \* Corresponding author:

Kuk Hui Son, MD, PhD,  
Department of Thoracic and Cardiovascular Surgery,  
Gachon University Gil Medical Centre,  
21 Namdong-daero 774beon-gil, Namdong-gu,  
Incheon, Republic of Korea 21565  
Phone: +82-32-460-2783  
Fax: +82-32-899-6039  
E-mail: dr632@gilhospital.com

## \* Corresponding author:

Yoon-Hyeong Choi, PhD,  
Department of Preventive Medicine,  
Gachon University College of Medicine,  
155 Gaetbeol-ro, Yeonsu-gu,  
Incheon, Republic of Korea 21999  
Phone: +82-32-899-6586  
Fax: +82-32-468-2154  
E-mail: yoonchoi@gachon.ac.kr

## Supplementary Material

**Supplemental Material, Table S1.** Body mass index-adjusted OR (95% CIs) for sarcopenia by red cell distribution width

| Red cell distribution width | Sarcopenia/<br>Participants | Non-adjustment <sup>a</sup><br>for body mass index |              | Adjustment <sup>b</sup><br>for body mass index |              |
|-----------------------------|-----------------------------|----------------------------------------------------|--------------|------------------------------------------------|--------------|
|                             |                             | OR                                                 | (95% CI)     | OR                                             | (95% CI)     |
| Q1 (10.5-12.0 %)            | 641/2676                    | 1.00                                               | (Reference)  | 1.00                                           | (Reference)  |
| Q2 (12.1-12.4 %)            | 786/2732                    | 0.98                                               | (0.87, 1.10) | 0.83                                           | (0.73, 0.94) |
| Q3 (12.5-13.0 %)            | 1220/3315                   | 1.41                                               | (1.23, 1.61) | 1.04                                           | (0.89, 1.22) |
| Q4 (13.1-31.6 %)            | 1234/3038                   | 1.72                                               | (1.43, 2.06) | 1.23                                           | (0.97, 1.55) |
| <i>P for trend</i>          |                             | <i>&lt;0.001</i>                                   |              | <i>0.046</i>                                   |              |

<sup>a</sup>Adjusted for age, sex, race/ethnicity, education, household income, smoking pack-years, moderate-to-vigorous physical activity, hypertension, diabetes, cardiovascular disease, C-reactive protein, and hemoglobin (Model D in Table 3).

<sup>b</sup>Further adjusted for body mass index.

**Supplemental Material, Table S2.** Characteristics of study population by obesity status

| Characteristics          | Normal weight<br>(n=3722) | Overweight<br>(n=4260) | Obesity<br>(n=3779) | <i>P</i> -value |
|--------------------------|---------------------------|------------------------|---------------------|-----------------|
| Age [years] <sup>a</sup> | 42.32 ±0.32               | 46.90 ±0.33            | 46.84 ±0.35         | <.001           |
| BMI [kg/m <sup>2</sup> ] | 22.19 ±0.04               | 27.41 ±0.03            | 34.67 ±0.08         | <.001           |
| CRP [mg/dL]              | 0.24 ±0.01                | 0.37 ±0.01             | 0.59 ±0.02          | <.001           |
| Hemoglobin [g/dL]        | 14.4 ±0.05                | 14.8 ±0.04             | 14.5 ±0.04          | 0.158           |
| ASM [%]                  | 29.34 ±0.12               | 28.07 ±0.10            | 25.29 ±0.08         | <.001           |
| RDW [%]                  | 12.47 ±0.02               | 12.55 ±0.02            | 12.79 ±0.03         | <.001           |
| Sex [n (%)] <sup>b</sup> |                           |                        |                     |                 |
| Male                     | 1782 (43.0)               | 2527 (59.6)            | 1656 (45.5)         | <.001           |
| Female                   | 1940 (57.0)               | 1733 (40.4)            | 2123 (54.5)         |                 |
| Race/ethnicity [n (%)]   |                           |                        |                     |                 |
| Non-Hispanic White       | 2142 (76.2)               | 2171 (73.3)            | 1810 (72.1)         | <.001           |
| Non-Hispanic Black       | 605 (7.9)                 | 732 (8.9)              | 904 (12.9)          |                 |
| Mexican American         | 642 (5.4)                 | 1033 (7.6)             | 834 (7.0)           |                 |
| Other                    | 333 (10.5)                | 324 (10.2)             | 231 (8.0)           |                 |
| Education [n (%)]        |                           |                        |                     |                 |
| <High School             | 972 (16.2)                | 1286 (18.1)            | 1124 (18.4)         | <.001           |
| High School              | 851 (23.4)                | 992 (25.7)             | 961 (28.1)          |                 |
| >High School             | 1899 (60.4)               | 1982 (56.2)            | 1694 (53.5)         |                 |
| Household income [n (%)] |                           |                        |                     |                 |
| PIR <1                   | 646 (13.1)                | 665 (10.2)             | 627 (12.3)          | <.001           |
| PIR 1 to <3              | 1460 (33.7)               | 1744 (34.6)            | 1639 (37.6)         |                 |
| PIR ≥3                   | 1616 (53.2)               | 1851 (55.2)            | 1513 (50.2)         |                 |
| Smoking pack-years       |                           |                        |                     |                 |
| Never                    | 2009 (54.2)               | 2312 (53.1)            | 2163 (55.6)         | <.001           |
| <20                      | 1210 (34.2)               | 1297 (31.9)            | 1052 (28.8)         |                 |
| ≥20                      | 503 (11.5)                | 651 (15.0)             | 564 (15.6)          |                 |
| MVPA [n (%)]             |                           |                        |                     |                 |
| Low                      | 2311 (56.7)               | 2766 (59.6)            | 2674 (68.0)         | <.001           |
| High                     | 1411 (43.3)               | 1494 (40.4)            | 1105 (32.0)         |                 |
| Diabetes [n (%)]         |                           |                        |                     |                 |
| No                       | 3516 (96.8)               | 3800 (93.3)            | 3157 (87.2)         | <.001           |
| Yes                      | 206 (3.2)                 | 460 (6.7)              | 622 (12.8)          |                 |
| Hypertension [n (%)]     |                           |                        |                     |                 |
| No                       | 2811 (83.0)               | 2640 (69.3)            | 1991 (57.7)         | <.001           |
| Yes                      | 911 (17.0)                | 1620 (30.7)            | 1788 (42.3)         |                 |
| CVD [n (%)]              |                           |                        |                     |                 |
| No                       | 3434 (95.2)               | 3817 (92.2)            | 3296 (89.5)         | <.001           |
| Yes                      | 288 (4.8)                 | 443 (7.8)              | 483 (10.5)          |                 |

<sup>a</sup> Weighted mean±SE from survey mean (all such values).

<sup>b</sup> Weighted percentages from survey frequency (all such values).

*P* for trend was calculated using linear regression for continuous variables; *P* for difference was calculated using Rao-Scott chi-square test for categorical variables.

BMI, body mass index; CRP, C-reactive protein; ASM, appendicular skeletal muscle mass; RDW, red cell distribution width; PIR, poverty income ratio; MVPA, moderate-to-vigorous physical activity; CVD, cardiovascular disease.

**Supplemental Material, Table S3.** OR (95% CIs) for sarcopenic obesity by red cell distribution width

| Red blood cell distribution width                                                                                                                         | Sarcopenic obesity/Participants | OR 95% CI         |
|-----------------------------------------------------------------------------------------------------------------------------------------------------------|---------------------------------|-------------------|
| <b>Sarcopenic obesity defined using appendicular skeletal muscle mass<sup>a</sup> plus body mass index<sup>b</sup></b>                                    |                                 |                   |
| Q1 (10.5-12.0 %)                                                                                                                                          | 321/2676                        | 1.00 (Reference)  |
| Q2 (12.1-12.4 %)                                                                                                                                          | 395/2732                        | 1.15 (0.92, 1.42) |
| Q3 (12.5-13.0 %)                                                                                                                                          | 685/3315                        | 1.83 (1.49, 2.23) |
| Q4 (13.1-31.6 %)                                                                                                                                          | 710/3038                        | 2.22 (1.79, 2.77) |
| <i>P for trend</i>                                                                                                                                        |                                 | <0.001            |
| <b>Sarcopenic obesity defined using both appendicular skeletal muscle mass<sup>a</sup> and walking speed<sup>c</sup> plus body mass index<sup>b</sup></b> |                                 |                   |
| Q1 (10.5-12.0 %)                                                                                                                                          | 14/481                          | 1.00 (Reference)  |
| Q2 (12.1-12.4 %)                                                                                                                                          | 29/592                          | 1.89 (0.66, 5.42) |
| Q3 (12.5-13.0 %)                                                                                                                                          | 42/888                          | 1.27 (0.46, 3.54) |
| Q4 (13.1-31.6 %)                                                                                                                                          | 83/864                          | 3.50 (1.26, 9.70) |
| <i>P for trend</i>                                                                                                                                        |                                 | 0.019             |

<sup>a</sup>Low muscle mass defined as appendicular skeletal muscle mass <29.36% for males and <22.41% for females.

<sup>b</sup>Obesity defined as body mass index  $\geq 30$ kg/m<sup>2</sup>.

<sup>c</sup>Decline physical function defined as walking speed  $\leq 0.8$  m/s.

<sup>d</sup>Data for these analyses (n=2,825) used subpopulation ( $\geq 50$  years) that had walking speed information.

Adjusted for age, sex, race/ethnicity, education, household income, smoking pack-years, moderate-to-vigorous physical activity, hypertension, diabetes, cardiovascular disease, C-reactive protein, and hemoglobin (Model D in Table 3).

**Supplemental Material, Table S4.** OR (95% CIs) for sarcopenia and sarcopenic obesity by red cell distribution width by age group

| Red blood cell distribution width                                                                                      | Sarcopenia or sarcopenic obesity/ Participants | Overall |              | Age: 20-39 years |              | Age: 40-59 years |              | Age: ≥60 years |              |
|------------------------------------------------------------------------------------------------------------------------|------------------------------------------------|---------|--------------|------------------|--------------|------------------|--------------|----------------|--------------|
|                                                                                                                        |                                                | OR      | 95% CI       | OR               | 95% CI       | OR               | 95% CI       | OR             | 95% CI       |
| <b>Sarcopenia defined using appendicular skeletal muscle mass<sup>a</sup></b>                                          |                                                |         |              |                  |              |                  |              |                |              |
| Q1 (10.5-12.0 %)                                                                                                       | 641/2676                                       | 1.00    | (Reference)  | 1.00             | (Reference)  | 1.00             | (Reference)  | 1.00           | (Reference)  |
| Q2 (12.1-12.4 %)                                                                                                       | 786/2732                                       | 0.98    | (0.87, 1.10) | 0.99             | (0.75, 1.31) | 0.82             | (0.68, 0.99) | 1.24           | (0.97, 1.58) |
| Q3 (12.5-13.0 %)                                                                                                       | 1220/3315                                      | 1.41    | (1.23, 1.61) | 1.39             | (1.05, 1.84) | 1.43             | (1.16, 1.76) | 1.31           | (1.05, 1.63) |
| Q4 (13.1-31.6 %)                                                                                                       | 1234/3038                                      | 1.72    | (1.43, 2.06) | 2.45             | (1.79, 3.34) | 1.58             | (1.15, 2.17) | 1.52           | (1.24, 1.87) |
| <i>P for trend</i>                                                                                                     |                                                | <0.001  |              | <0.001           |              | <0.001           |              | <0.001         |              |
| <b>Sarcopenic obesity defined using appendicular skeletal muscle mass<sup>a</sup> plus body mass index<sup>b</sup></b> |                                                |         |              |                  |              |                  |              |                |              |
| Q1 (10.5-12.0 %)                                                                                                       | 321/2676                                       | 1.00    | (Reference)  | 1.00             | (Reference)  | 1.00             | (Reference)  | 1.00           | (Reference)  |
| Q2 (12.1-12.4 %)                                                                                                       | 395/2732                                       | 1.15    | (0.92, 1.42) | 1.07             | (0.76, 1.56) | 0.99             | (0.74, 1.32) | 1.42           | (0.96, 2.10) |
| Q3 (12.5-13.0 %)                                                                                                       | 685/3315                                       | 1.83    | (1.49, 2.23) | 1.83             | (1.26, 2.66) | 1.84             | (1.41, 2.39) | 1.60           | (1.17, 2.20) |
| Q4 (13.1-31.6 %)                                                                                                       | 710/3038                                       | 2.22    | (1.79, 2.77) | 2.57             | (1.81, 3.65) | 2.04             | (1.42, 2.93) | 2.05           | (1.55, 2.73) |
| <i>P for trend</i>                                                                                                     |                                                | <0.001  |              | <0.001           |              | <0.001           |              | <0.001         |              |

<sup>a</sup>Low muscle mass defined as appendicular skeletal muscle mass <29.36% for males and <22.41% for females.

<sup>b</sup>Obesity defined as body mass index ≥30kg/m<sup>2</sup>.

Adjusted for age, sex, race/ethnicity, education, household income, smoking pack-years, moderate-to-vigorous physical activity, hypertension, diabetes, cardiovascular disease, C-reactive protein, and hemoglobin (Model D in Table 3).

*P* for interaction by age = 0.189 for sarcopenia and 0.569 for sarcopenic obesity.
